# Supplementary material for: Spatial patterns of urbanising landscapes in the North Indian Punjab show features predicted by fractal theory
Source: PubMed Central journal article supplement (PMC8810886; doi:10.1038/s41598-022-05906-4), 2022-02-02
Supplement: 41598_2022_5906_MOESM1_ESM.pdf [file 41598_2022_5906_MOESM1_ESM.pdf]

## Supplementary information

### Spatial patterns of urbanising landscapes in the North Indian Punjab show features predicted by fractal theory

Thanh Thi Nguyen <sup>a\*</sup>, Ellen Hoffmann <sup>a</sup>, Andreas Buerkert <sup>a</sup>

<sup>a</sup> Organic Plant Production and Agroecosystems Research in the Tropics and Subtropics (OPATS), University of Kassel, Steinstr. 19, 37123 Witzenhausen, Germany

\* Corresponding author, e-mail: thanh.nguyen@uni-kassel.de

#### Supplementary Table

*Table S1.* Comparison of moving window and centroid sampling approaches, p-value in t-test the count in in three flights (each four samples) at large window level and three centroids Ludhiana, Patiala, and Jalandhar in Punjab regions.

| Moving window<br>(Large windows) |          | Centroid |         |           |
|----------------------------------|----------|----------|---------|-----------|
|                                  |          | Ludhiana | Patiala | Jalandhar |
| Flight 1                         | Sample 1 | 0.016*   | 0.016*  | 0.017*    |
|                                  | Sample 2 | 0.032*   | 0.032*  | 0.033*    |
|                                  | Sample 3 | 0.069    | 0.069   | 0.073     |
|                                  | Sample 4 | 0.087    | 0.087   | 0.092     |
| Flight 2                         | Sample 1 | 0.057    | 0.057   | 0.041*    |
|                                  | Sample 2 | 0.057    | 0.057   | 0.061     |
|                                  | Sample 3 | 0.051    | 0.051   | 0.055     |
|                                  | Sample 4 | 0.065    | 0.065   | 0.069     |
| Flight 3                         | Sample 1 | 0.168    | 0.168   | 0.179     |
|                                  | Sample 2 | 0.173    | 0.157   | 0.168     |
|                                  | Sample 3 | 0.133    | 0.122   | 0.131     |
|                                  | Sample 4 | 0.066    | 0.064   | 0.069     |

\*Differ from overall frequency at  $p < 0.05$
